# Supplementary material
Source: PubMed Central journal article supplement (PMC4393780)

**A**

78,683 traits → Mean % of parent lineage > 0.1% → 49,928 traits

Initial GWAS Screen: 97 Canonical populations  
110 Highly heritable

**B**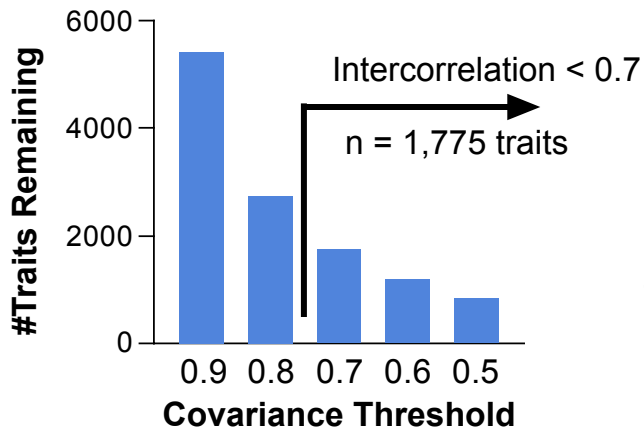**C Common Environmental**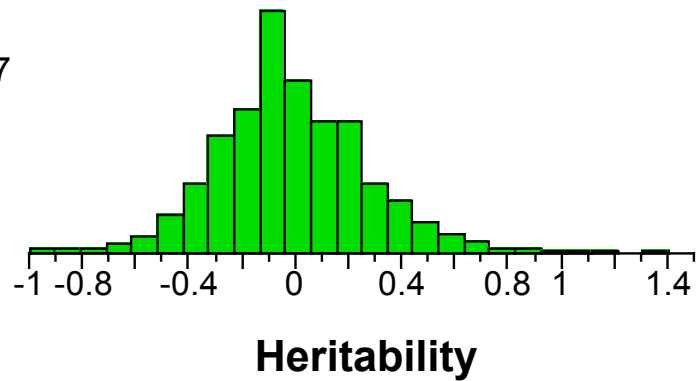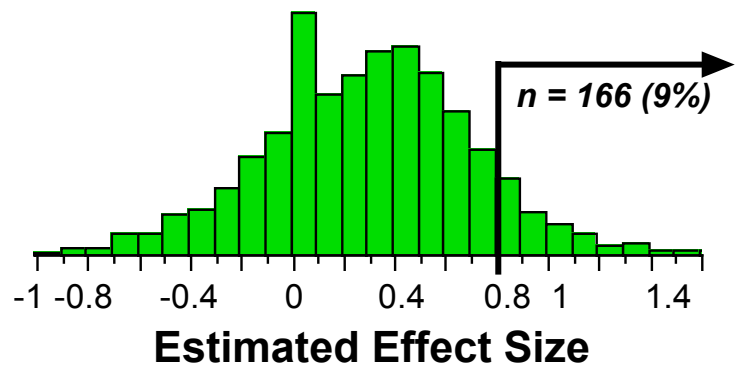

Supplement: NIHMS668942-supplement-4.pdf [file NIHMS668942-supplement-4.pdf]
