# Supplementary material
Source: PubMed Central journal article supplement (PMC4393780)

Window Position Chromosome 10:

97,350,000 97,400,000 97,450,000 97,500,000 97,550,000 97,600,000 97,650,000 97,700,000

MF1516

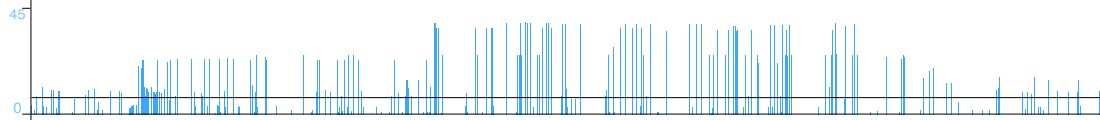

P2:10491

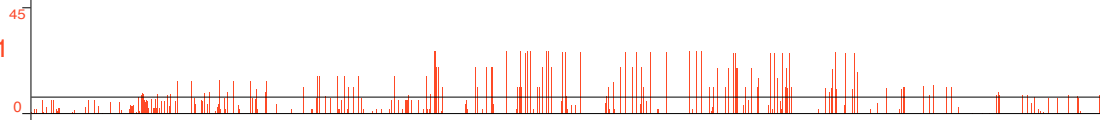

P2:3460

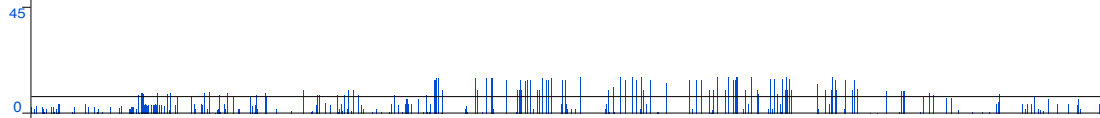

P2:4159

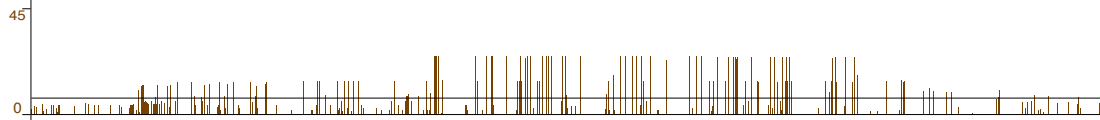

P2:4186

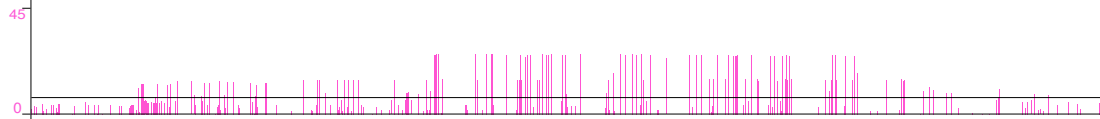

P2:4213

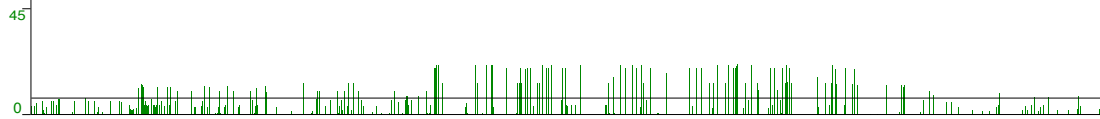

RefSeq Genes  
ALDH18A1  
ALDH18A1  
TCTN3  
TCTN3  
ENTPD1  
ENTPD1-AS1  
ENTPD1  
ENTPD1  
ENTPD1  
ENTPD1  
ENTPD1  
ENTPD1  
C10orf131

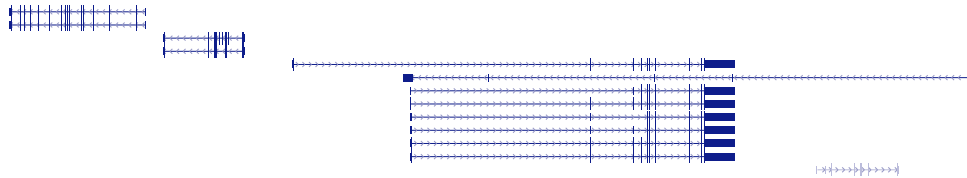

Supplement: NIHMS668942-supplement-6.pdf [file NIHMS668942-supplement-6.pdf]
