# Supplementary material
Source: PubMed Central journal article supplement (PMC4393780)

# Panel

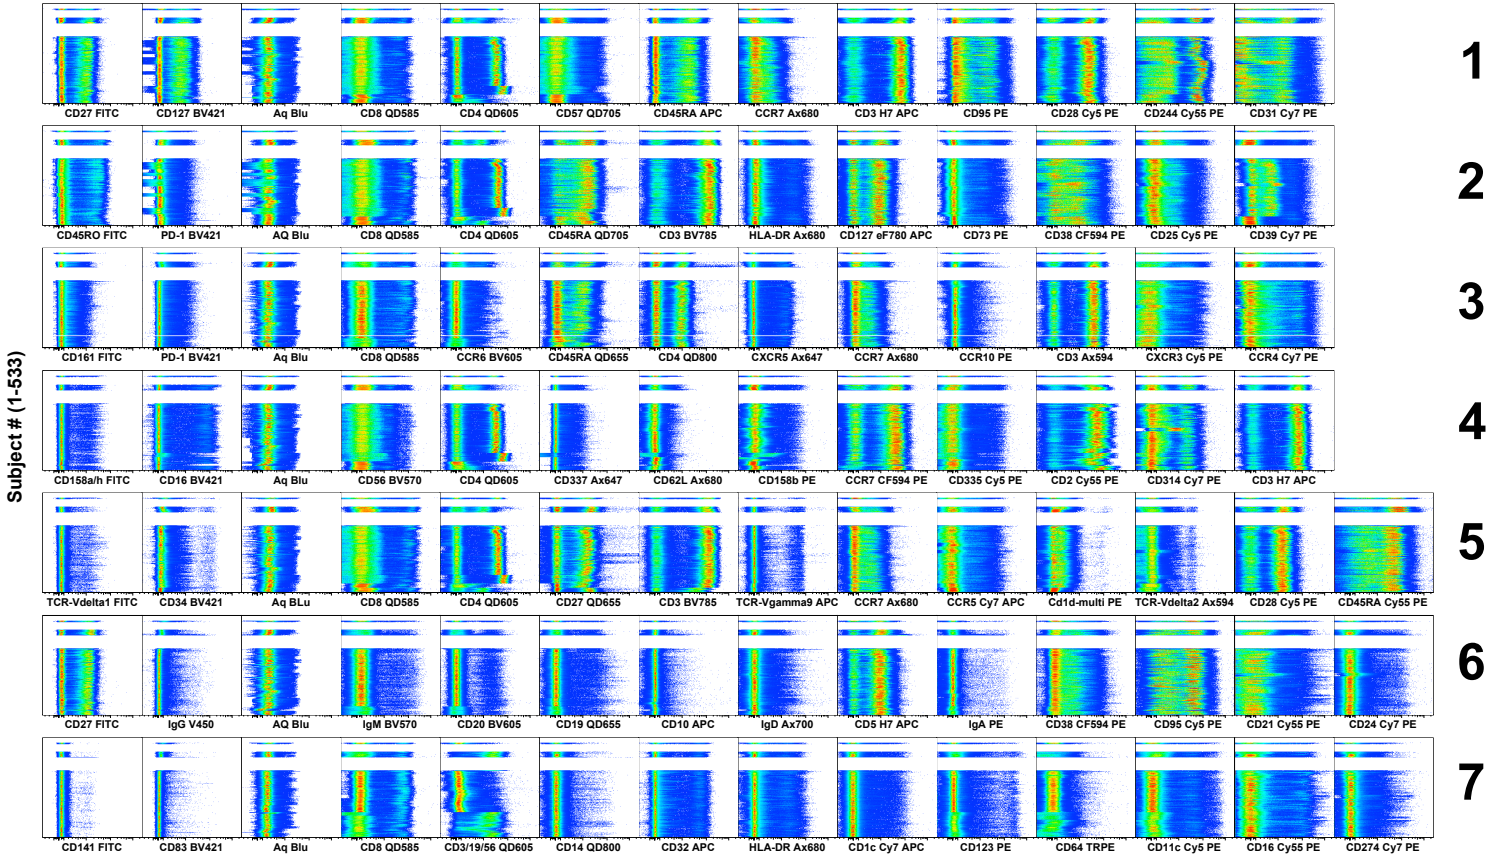

Supplement: NIHMS668942-supplement-1.pdf [file NIHMS668942-supplement-1.pdf]

**All Panels**

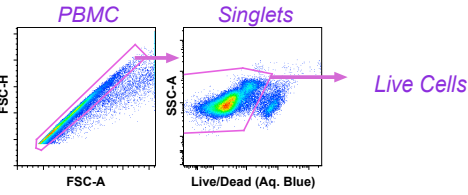

**Panel 1**

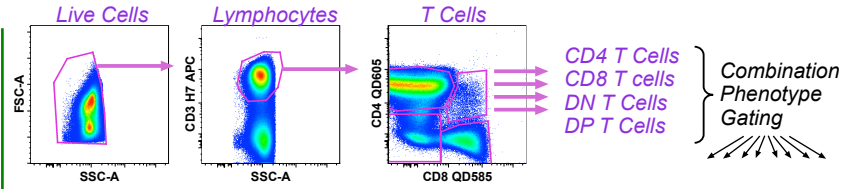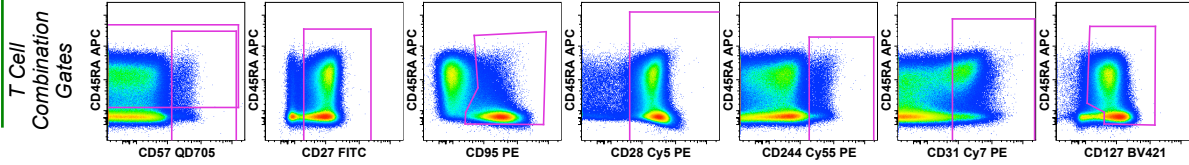

**Panel 2**

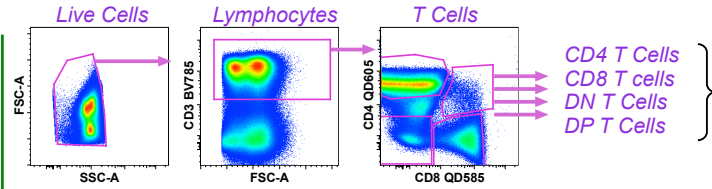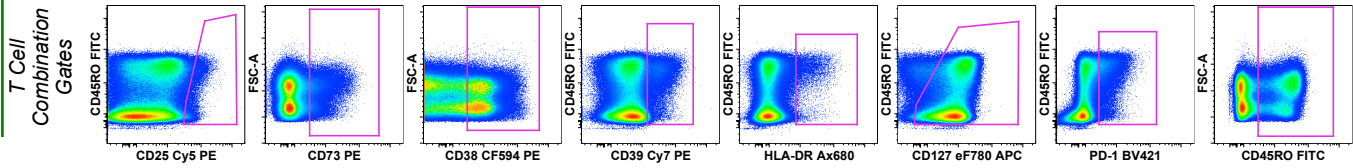

**Panel 3**

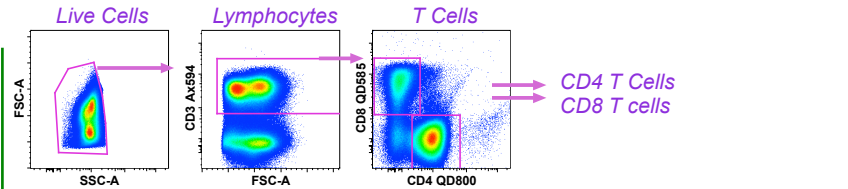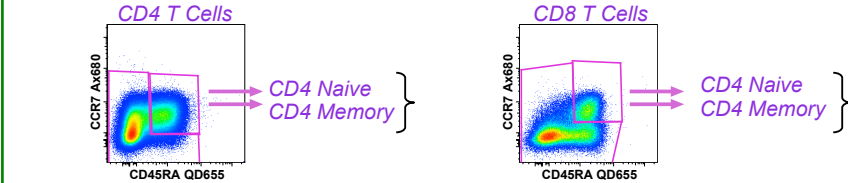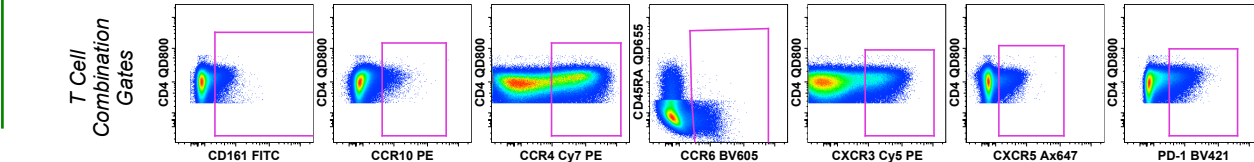

**Panel 4**

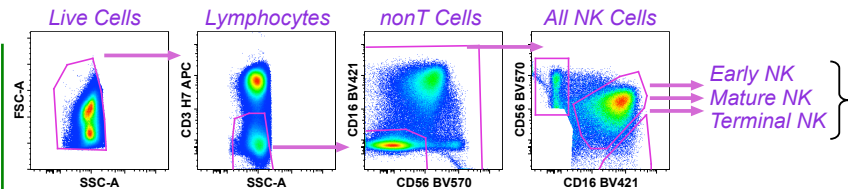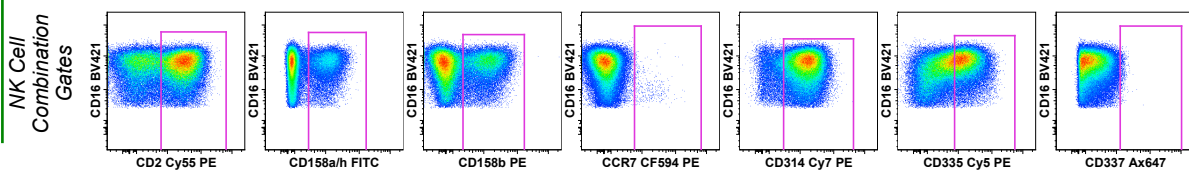

Supplement: NIHMS668942-supplement-2.pdf [file NIHMS668942-supplement-2.pdf]

### Panel 5

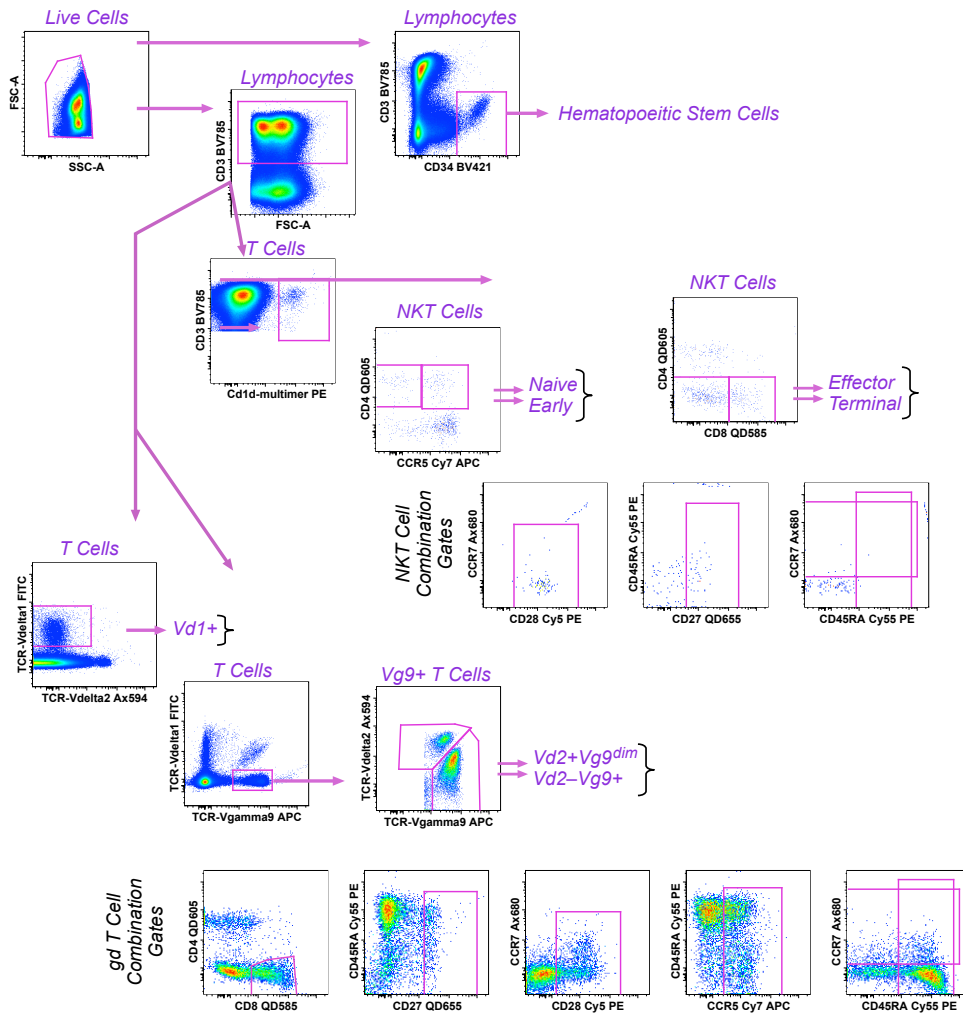

### Panel 6

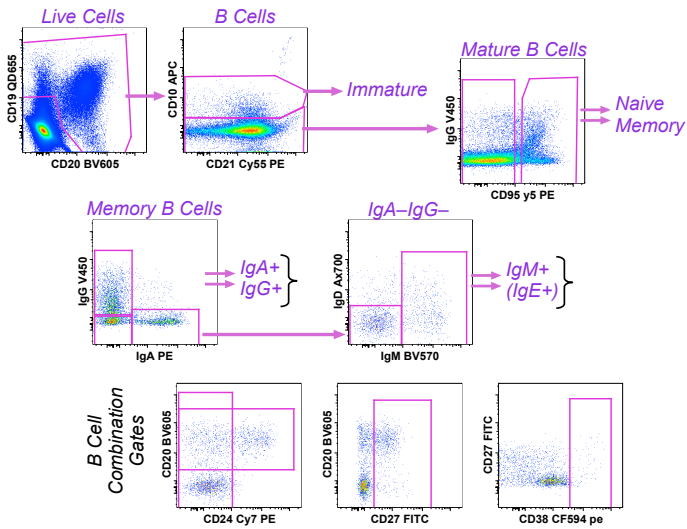

### Panel 7

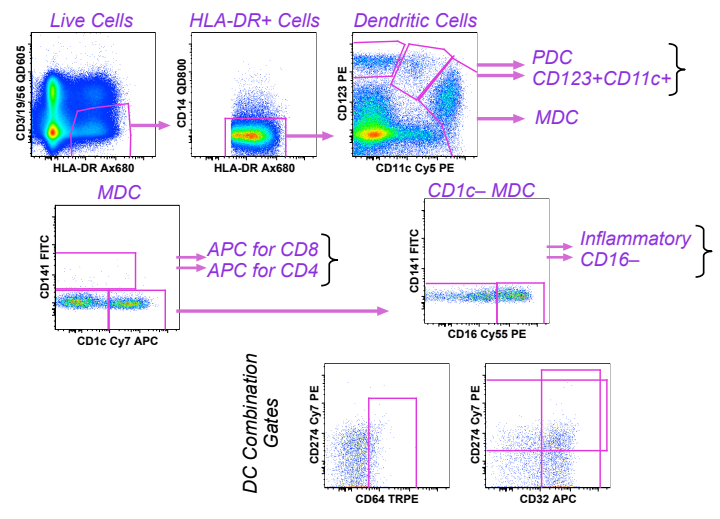

Supplement: NIHMS668942-supplement-3.pdf [file NIHMS668942-supplement-3.pdf]

**A**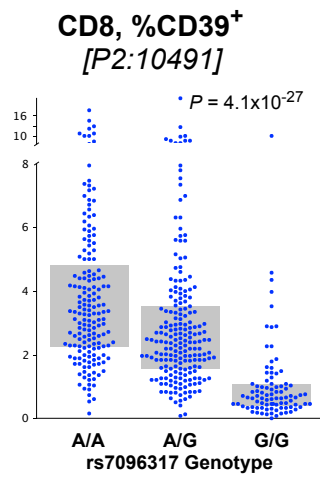**B**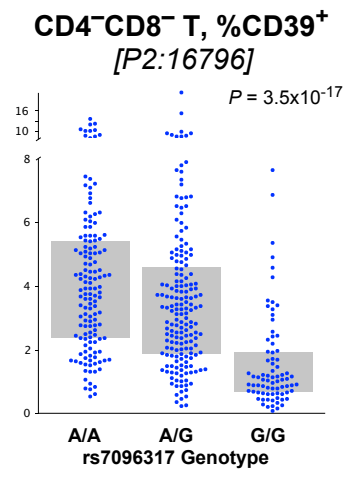**C**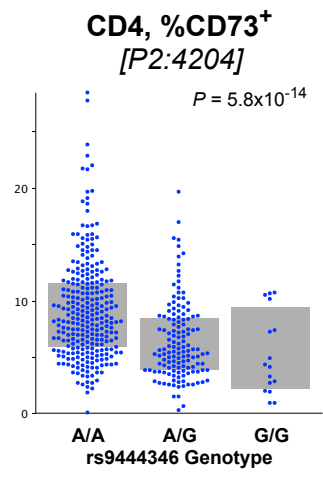

Supplement: NIHMS668942-supplement-7.pdf [file NIHMS668942-supplement-7.pdf]

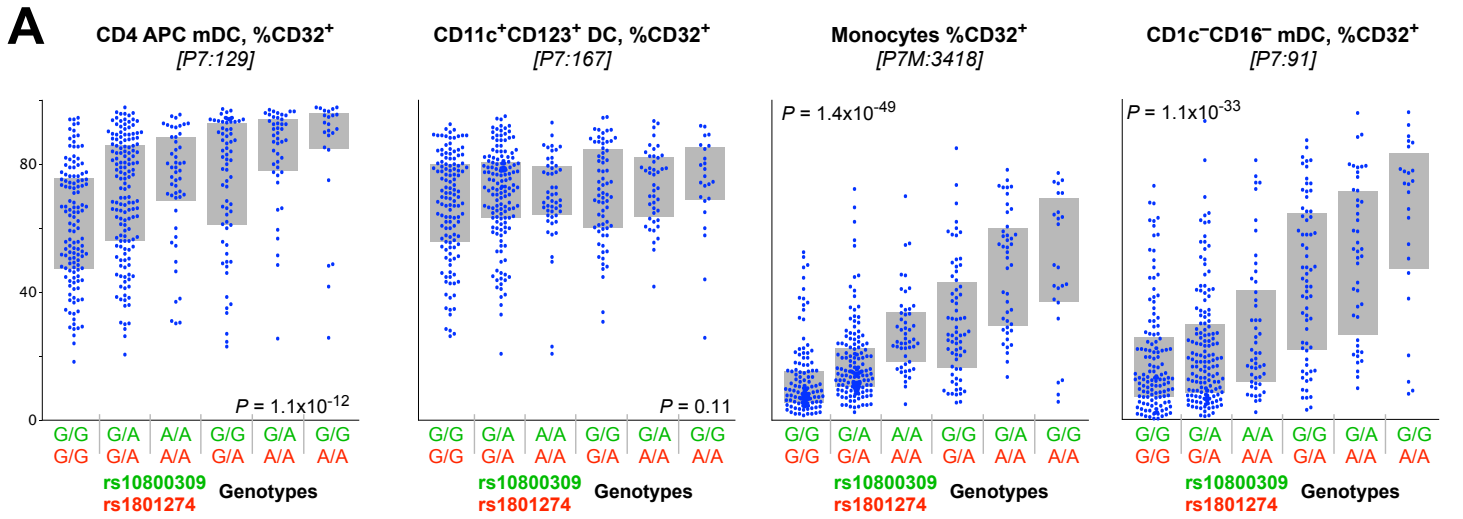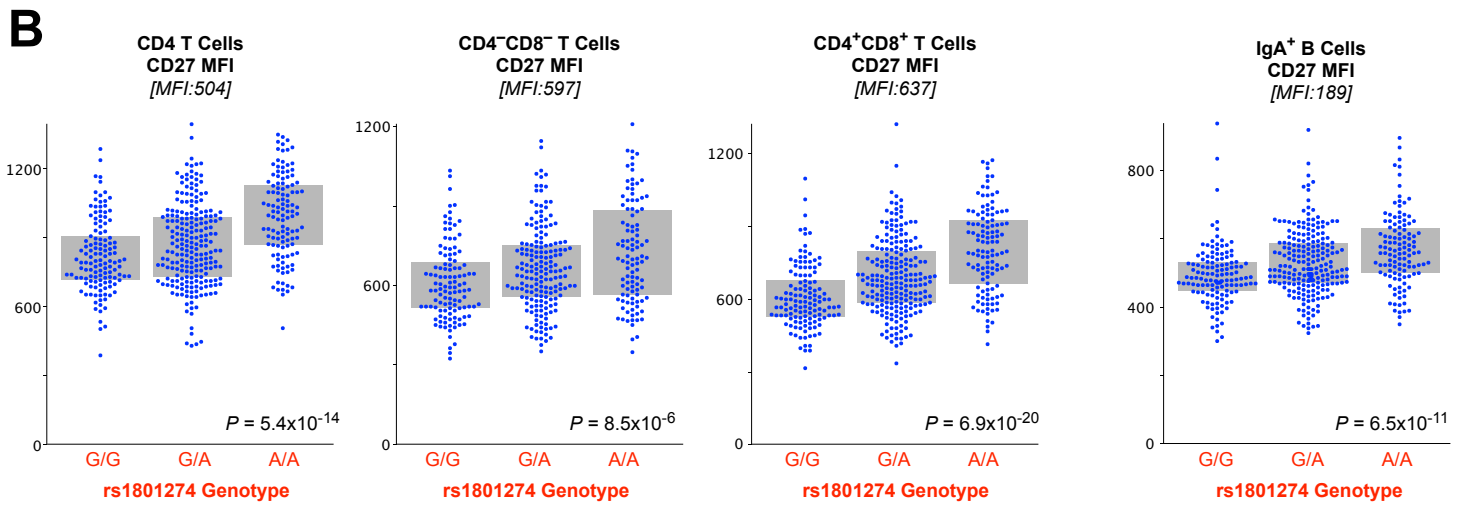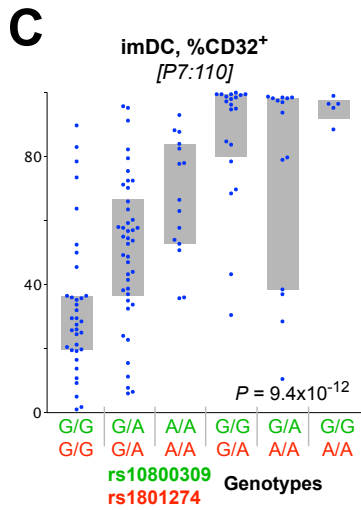

Supplement: NIHMS668942-supplement-8.pdf [file NIHMS668942-supplement-8.pdf]
